# Supplementary material for: Tuning the intramolecular charge transfer (ICT) process in push–pull systems: effect of nitro groups
Source: Royal Society of Chemistry journal article supplement (doi:10.1039/c6ra17521j), 2016-01-01
Supplement: c6ra17521j1.pdf [file c6ra17521j1.pdf]

## Electronic Supplementary Information (ESI)

### Tuning The Intra-molecular Charge Transfer (ICT) Process in Push-Pull Systems: Effect of Nitro group

Sumit Kumar Panja, Nidhi Dwivedi, Satyen Saha\*  
Department of Chemistry, Institute of Science  
Banaras Hindu University,  
Varanasi-221005, India

#### 1. Synthesis of potassium salt of nitro-phenol derivative

##### Synthetic procedure:

Initially nitrophenol derivative is to be dissolved in methanol solvent. After that saturated solution of potassium carbonate ( $K_2CO_3$ ) in water is to be added slowly because heat is generated. Resulting solution becomes fluorescent yellow and stirred at room temperature. Yellow colour solid is precipitated out from the solvent. Filtered and dried. Pure potassium salt of nitrophenol is obtained.

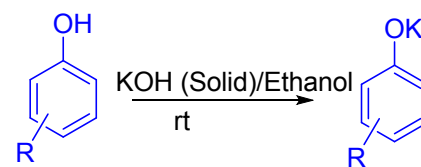

Mole ratio Phenol:  $K_2CO_3$  = 1: 1

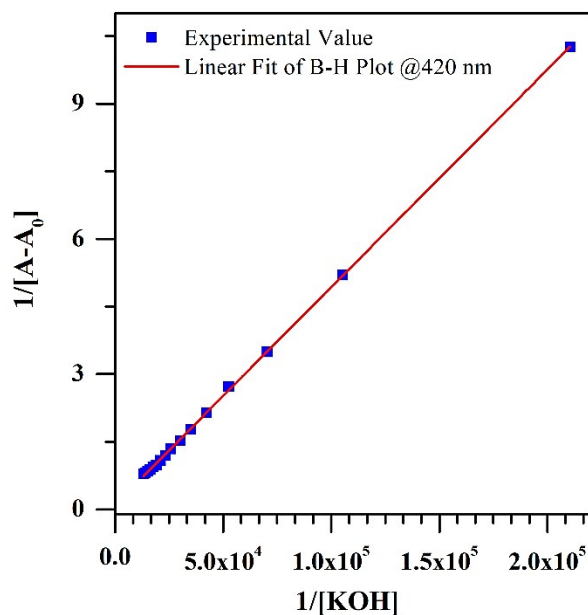

Figure 1a: B-H plot for KNP formation at 420 nm in ACN

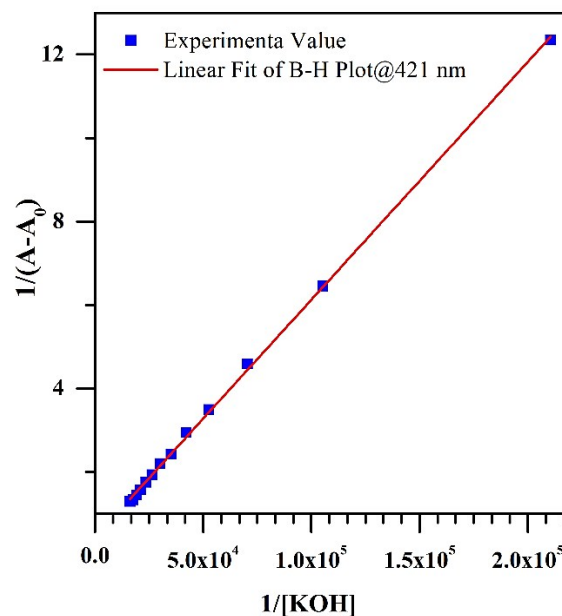

Figure 1b: B-H plot for KDNP formation at 421 nm in ACN

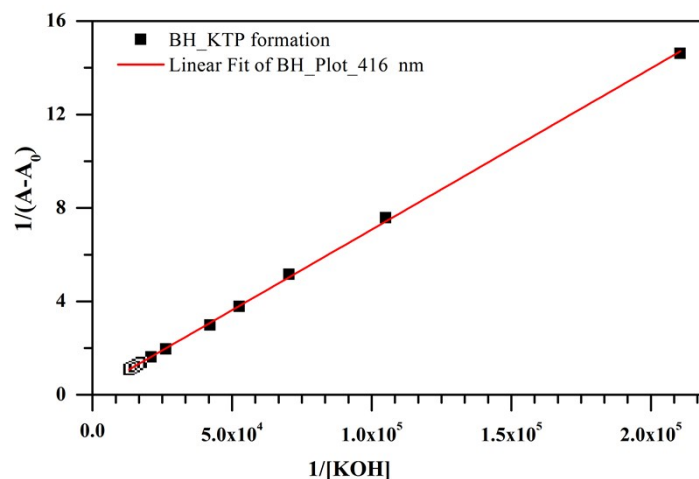

**Figure 1c:** B-H plot for KTP formation at 435 nm in ACN

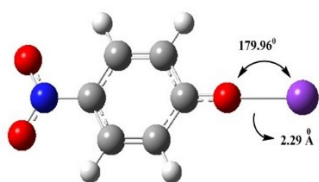

**Figure 2a:** Optimizes Structure of KNP (Lowest Energy)

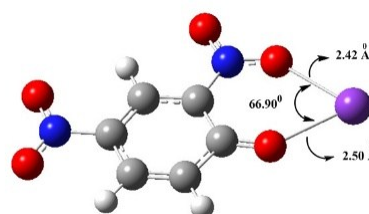

**Figure 2b:** Optimizes Structure of KDNP (Lowest Energy)

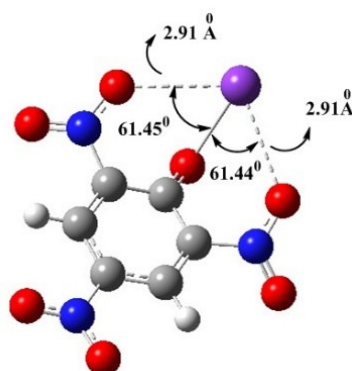

**Figure 2c:** Optimizes Structure of KTP (Lowest Energy)

**Table 1:** Electronic Transition energy from Td-DFT Calculation with different functional

|           | B3LYP/6-311G (d, p)         |                            | CAM-B3LYP/6-311G (d, p)    |                            |
|-----------|-----------------------------|----------------------------|----------------------------|----------------------------|
|           | GAS phase                   | ACN                        | GAS phase                  | ACN                        |
| HNP       | 295.3 nm<br>( $f=0.2674$ )  | 324.9 nm<br>( $f=0.3533$ ) | 270.9 nm<br>( $f=0.0004$ ) | 283.5 nm<br>( $f=0.3833$ ) |
| HNP anion | 351.7 nm<br>( $f=0.4639$ )  | 367.6 nm<br>( $f=0.5774$ ) | 349.0 nm<br>( $f=0.5196$ ) | 356.0 nm<br>( $f=0.6332$ ) |
| KNP salt  | 468.29 nm<br>( $f=0.0005$ ) | 375.9 nm<br>( $f=0.5156$ ) | 363.7 nm<br>( $f=0.0008$ ) | 354.3 nm<br>( $f=0.5597$ ) |
| HDNP      | 339.2 nm<br>( $f=0.0518$ )  | 354.3 nm<br>( $f=0.0693$ ) | 293.4 nm<br>( $f=0.0801$ ) | 303.10 nm<br>$f=0.1093$    |

|            |                              |                              |                              |                              |
|------------|------------------------------|------------------------------|------------------------------|------------------------------|
| HDNP anion | 359.9 nm<br>( $f = 0.2873$ ) | 412.0 nm<br>( $f = 0.2594$ ) | 359.9 nm<br>( $f = 0.2873$ ) | 371.6 nm<br>( $f = 0.3485$ ) |
| KDNP salt  | 402.1 nm<br>( $f = 0.1154$ ) | 418.6 nm<br>( $f = 0.1987$ ) | 352.1 nm<br>( $f = 0.1650$ ) | 365.0 nm<br>( $f = 0.2593$ ) |
| HTNP       | 341.0 nm<br>( $f = 0.0589$ ) | 344.0 nm<br>( $f = 0.1087$ ) | 309.9 nm<br>( $f = 0.0191$ ) | 306.7 nm<br>( $f = 0.0678$ ) |
| HTNP anion | 451.2 nm<br>( $f = 0.0479$ ) | 437.9 nm<br>( $f = 0.1130$ ) | 418.6 nm ( $f =$<br>0.0010)  | 410.8 nm<br>( $f = 0.0118$ ) |
| KTNP salt  | 406.3 nm<br>( $f = 0.1222$ ) | 415.9 nm<br>( $f = 0.1606$ ) | 348.2 nm<br>( $f = 0.0994$ ) | 388.1 nm<br>( $f = 0.0154$ ) |

\* $f$  = Oscillator strength; nm = nanometre
